# Supplementary material for: Prediction of Severe Hypoglycemia
Source: Oxford University Press journal article supplement (doi:10.2337/dc06-1386), 2007-05-25
Supplement: dc061386-sup-dc1386onlineappendix.doc [file dc061386-sup-dc1386onlineappendix.doc]

APPENDIX: Computing the Low Blood Glucose Index (LBGI)

Symmetrization of the BG Measurement Scale: The BG levels are measured in mg/dl in the USA and in mmol/L (or mM) most elsewhere. Throughout this paper we employ the mM scale. The two scales are directly related by: 18 mg/dl = 1 mM. The whole range of most BG reference meters is 1.1 to 33.3 mM, which is considered to cover practically all observed values. According to the recommendations of the DCCT, the target BG range for a person with IDDM is considered to be 3.9 to 10 mM. Hypoglycemia is identified as a BG below 3.9 mM, hyperglycemia is a BG above 10 mM. It is obvious that this scale is not symmetric - the hyperglycemic range (10 to 33.3mM) is numerically much greater that the hypoglycemic range (1.1-3.9mM) and the euglycemic range (3.9-10mM) is not centered within the scale. As a result the numerical center of the scale (17.2mM) is distant from its “clinical center” - the clinically desired clustering of the BG values of patients with diabetes around 6-6.5mM. This asymmetry of the scale leads to skewed distributions of patients’ BG readings that can be corrected by a scale transformation based on two clinical assumptions:

**A1:** The transformed whole BG range should be symmetric around zero.

**A2:** The transformed target BG range should be symmetric around zero.

In other words, let *f(BG)* be a continuous function defined on the BG range *[1.1, 33.3]* that has the general two-parameter analytical form

*f(BG,) = [(ln (BG ))‑],  > 0*

that satisfies the conditions **A1:** *f (33.3,) = - f (1.1,)* and **A2:** *f(10,) = - f(3.9,).* By multiplying by a third parameter ** we fix the minimal and maximal values of the transformed BG range at - * 10* and * 10* respectively. These values are convenient for two reasons: first, a random variable with a central normal distribution would have 99.8% of its values within the interval *[- 10,  10],* and second, this provides a nice calibration of the BG risk function from 0 to 100 (see the next section). This scaling and the assumptions **A1** and **A2** lead to the equations

*(ln (33.3))‑ =  [(ln (1.1))‑]*

*(ln (10.0))‑ln‑*

*. [(ln (33.3))‑(ln (1.1)‑* * 10*

which are easily reduced to a single nonlinear equation for the parameter******. When solved numerically under the restriction **, it gives: *1.026**1.861* and *1.794[[1]](#footnote-2)* .*

The BG risk function: After fixing the parameters of *f(BG)* depending on the measurement scale that is being used, we define the quadratic function *r(BG)=10.f(BG)2*. The function *r(BG)* ranges from 0 to 100. Its minimum value is achieved at BG=6.25mM, a safe euglycemic BG reading, while its maximum is reached at the extreme ends of the BG scale. Thus, *r(BG)* can be interpreted as a measure of the risk associated with a certain BG level. The left branch of this parabola identifies the risk of hypoglycemia, while the right branch identifies the risk of hyperglycemia. Based on that, we define the Low and the High BG Indices as follows:

Let *x1, x2, ... xn* be a series of *n* BG readings, and let

*rl(BG)=r(BG)* if  *f(BG)<0* and *0* otherwise;

*rh(BG)=r(BG)* if  *f(BG)>0* and *0* otherwise.

The Low Blood Glucose [Risk] Index (LBGI) and the High BG [Risk] Index (HBGI) are then defined as:

and

respectively.

1. * If BG is measured in mg/dl, by replacing in the equations 33.3mM by 600mg/dl, 1.1mM by 20mg/dl, 10mM by 180mg/dl, and 3.9mM by 70mg/dl, we obtain *1.084**5.381,* *1.509.* [↑](#footnote-ref-2)
